# Supplementary material for: Cypress leaf-like Sb as anode material for high-performance sodium-ion batteries
Source: Royal Society of Chemistry journal article supplement (doi:10.1039/c5ta04703j), 2015-01-01
Supplement: c5ta04703j1.pdf [file c5ta04703j1.pdf]

Electronic Supplementary Material (ESI) for Journal of Materials Chemistry A  
This journal is © The Royal Society of Chemistry

## **Electronic Supplementary Information for**

### **Cypress Leaf-Like Sb as Anode Material for High-Performance Sodium-Ion Batteries**

**Hongshuai Hou, Mingjun Jing, Yan Zhang, Jun Chen, Zhaodong Huang and Xiaobo Ji\***

*College of Chemistry and Chemical Engineering, Central South University, Changsha, China. Fax: +86-731-88879616;  
Tel: +86-731-88879616; E-mail: xji.csu.edu@gmail.com*

## 1. Experimental Sections

### 1.1 Materials

SbCl<sub>3</sub> (Shanghai Titan Scientific Co., Ltd.), ethanediol (Sinopharm Chemical Reagent Co., Ltd.), ethanol (Shanghai Titan Scientific Co., Ltd.), Mg powder (Shanghai Longxin technology development Co., Ltd.), hydrochloric acid (Sinopharm Chemical Reagent Co., Ltd.), NaClO<sub>4</sub> (Alfa Aesar), Na (Sigma-Aldrich), fluoroethylene carbonate (FEC, Sigma-Aldrich), propylene carbonate (Sigma-Aldrich) and carboxymethyl cellulose (CMC, Alfa Aesar).

### 1.2 Preparation of cypress leaf-like Sb (CL-Sb)

2.0 g of SbCl<sub>3</sub> was dissolved into 80 mL ethanediol, and then 0.4 g of commercial Mg powder was added under vigorous magnetic stirring. After 2 h, 120 mL diluted hydrochloric acid (1 mol L<sup>-1</sup>) was added to remove the unreacted excess Mg. Vigorous stirring was maintained throughout all synthesis process. Finally, the product was collected by centrifugation and washed several times with deionized water and ethanol, followed by drying at 100 °C under vacuum.

### 1.3 Characterization

Transmission electron microscope (TEM, JEM-2100F), scanning electron microscope (SEM, FEI Quanta 200) and X-ray diffraction (XRD, Rigaku D/max 2550 VB+ 18kW, Cu K $\alpha$  radiation) were used to characterize the morphology and composition of samples.

### 1.4 Electrochemical tests

For electrochemical performance evaluation, coin-type half-cells were assembled in a glove box filled with Ar to investigate the sodium storage behaviors of as-prepared CL-Sb. A homogenous slurry was obtained through mixing the synthesized active materials with super P and carboxymethyl cellulose (70:15:15 in weight) in deionized water, and then it was painted on a copper foil. After solvent evaporation, the copper foil coated with active materials was cut, pressed and further dried at 100 °C under vacuum for 12 h. The tailored Cu foil coated with active materials was utilized as work electrode and metallic sodium was employed as the counter electrode, and Celgard 2400 was used as the separator. The electrolyte was a solution of 1 M NaClO<sub>4</sub> in propylene carbonate (PC) with 5% fluoroethylene carbonate (FEC) additive. Cyclic voltammetric measurements were performed on Solartron Analytical to examine the cathodic and anodic reaction using the above-mentioned cell in the voltage range of 2.0 - 0.01 V (vs. Na/Na<sup>+</sup>) at a scan rate of 0.1 mV s<sup>-1</sup>. Galvanostatic charge-discharge tests were carried out on Arbin battery cycler (BT2000) at suitable current densities between 0.01V and 2.0 V (vs. Na/Na<sup>+</sup>) for both charge (Na extraction) and discharge (Na insertion) at room temperature. The electrochemical impedance measurements were performed on Solartron Analytical at an AC voltage of 5 mV amplitude in the 100 kHz to 0.01 Hz after 5 charge-discharge cycles. The mass loading of the active material is about 1.0-1.2 mg.

## 2. Formation process of CL-Sb

As reported, the leaf-like patterns can be formed only through anisotropic growth of crystalline grains.<sup>1-3</sup> Here, the anisotropy comes from the Sb particles themselves, because Sb inherently possesses strong crystalline anisotropy.<sup>1</sup> As is well known, Mg is a kind of very active metal and it is more active than metallic Sb. When Mg was added to the SbCl<sub>3</sub> solution, Sb<sup>3+</sup> would be reduced to Sb, leading to the formation of a large number of fine Sb particles. Then, as illustrated in Scheme S1, the newly generated Sb particles collided and directionally aggregated resulting from the free diffusion and interaction among the Sb particles, and the large aggregated particles grew strictly along the preferred growth direction, resulting in the formation of the leaf-like crystal.

**Table S1** Comparison of the electrochemical performances of the as-prepared CL-Sb with previously reported Sb-based anode materials for SIBs.

| Materials                                        | Initial reversible capacity (mAh g <sup>-1</sup> ) | Cyclability (mAh g <sup>-1</sup> )             | Current density (mA g <sup>-1</sup> ) | References |
|--------------------------------------------------|----------------------------------------------------|------------------------------------------------|---------------------------------------|------------|
| Sn-Ge-Sb                                         | 833                                                | 662 after 50 cycles                            | 85                                    | 4          |
| FeSb <sub>2</sub>                                | 360                                                | /                                              | 0.1 C                                 | 5          |
| FeSb-TiC-C                                       | 215                                                | 210 after 60 cycles                            | 100                                   | 6          |
| SnSb nanocrystals                                | ~365                                               | 350 after 100 cycles                           | 330                                   | 7          |
|                                                  | 347                                                | 345 after 205 cycles                           | 100                                   | 8          |
| SnSb/carbon                                      | ~420                                               | 360 after 100 cycles                           | 100                                   | 9          |
|                                                  | 544                                                | 435 after 50 cycles                            | 100                                   | 10         |
| Cu-Sb                                            | 250                                                | ~425 after 100 cycles                          | 0.2 C                                 | 11         |
|                                                  | 616.85                                             | 485.6 after 120 cycles                         | 0.1 C                                 | 12         |
| Mo <sub>3</sub> Sb <sub>7</sub>                  | 330                                                | ~160 after 100 cycles                          | 3.5 C                                 | 13         |
| AlSb                                             | ~450                                               | ~250 after 50 cycles                           | 1/6 C                                 | 14         |
|                                                  | 422                                                | 350 after 300 cycles                           | 100                                   | 15         |
| Sb/C fibers                                      | 495                                                | 446 after 400 cycles                           | 200                                   | 16         |
| Sb/carbon microspheres                           | 402                                                | 372 after 100 cycles                           | 300                                   | 17         |
| Sb/N-carbon nanosheets                           | 340                                                | 305 after 60 cycles                            | 50                                    | 18         |
| milled Sb/C                                      | 610                                                | 575 after 100 cycles                           | 100                                   | 19         |
| Sb@C structures                                  | 230                                                | 190 after 10 cycles                            | 10                                    | 20         |
| Sb/carbon nanotube                               | 502                                                | 382 after 120 cycles                           | 200                                   | 21         |
| Sb/graphene                                      | ~600                                               | ~530 after 150 cycles                          | 328                                   | 22         |
| Sb/acetylene black                               | 520                                                | 473 after 70 cycles                            | 100                                   | 23         |
| Sb/Sb <sub>2</sub> O <sub>3</sub> /PPy nanowires | 466.81<br>520.64 at 19 <sup>th</sup> cycle         | 512.01 after 100 cycles                        | 66                                    | 24         |
| rod-like Sb/C                                    | 630.1                                              | 430.9 after 100 cycles                         | 50                                    | 25         |
| Pitaya-like Sb@C microspheres                    | 628                                                | ~584 after 100 cycles                          | 200                                   | 26         |
| Sb <sub>2</sub> O <sub>3</sub> /Sb@ graphene     | 527.9                                              | 486.5 after 275 cycles                         | 100                                   | 27         |
| Sb nanocrystals                                  | ~600                                               | ~580 after 100 cycles                          | 660                                   | 28         |
| Bulk Sb                                          | 537                                                | 576 after 160 cycles                           | 330                                   | 29         |
| Sb hollow nanospheres                            | 627                                                | 622.2 after 50 cycles                          | 50                                    | 30         |
| Sb porous hollow microspheres                    | 634.6<br>574.9                                     | 617 after 100 cycles<br>502.3 after 120 cycles | 100<br>660                            | 31         |
| CL-Sb                                            | 639.2<br>556.6                                     | 629 after 120 cycles<br>550 after 120 cycles   | 100<br>660                            | this work  |

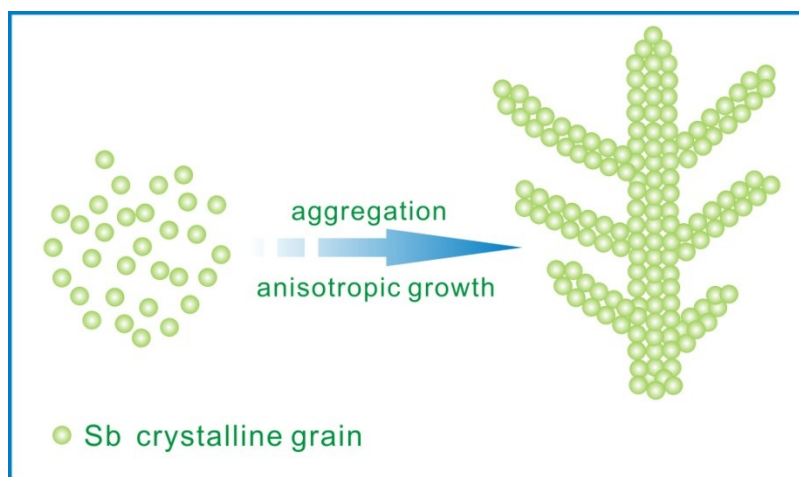

**Scheme S1** Illustration of the formation process of CL-Sb.

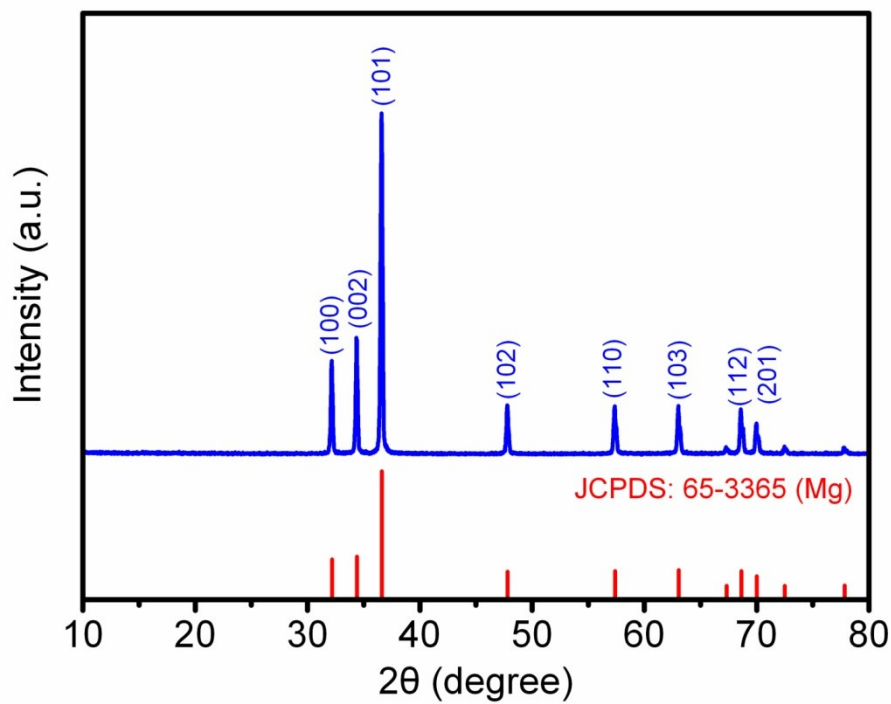

**Fig. S1** XRD pattern of Mg powder.

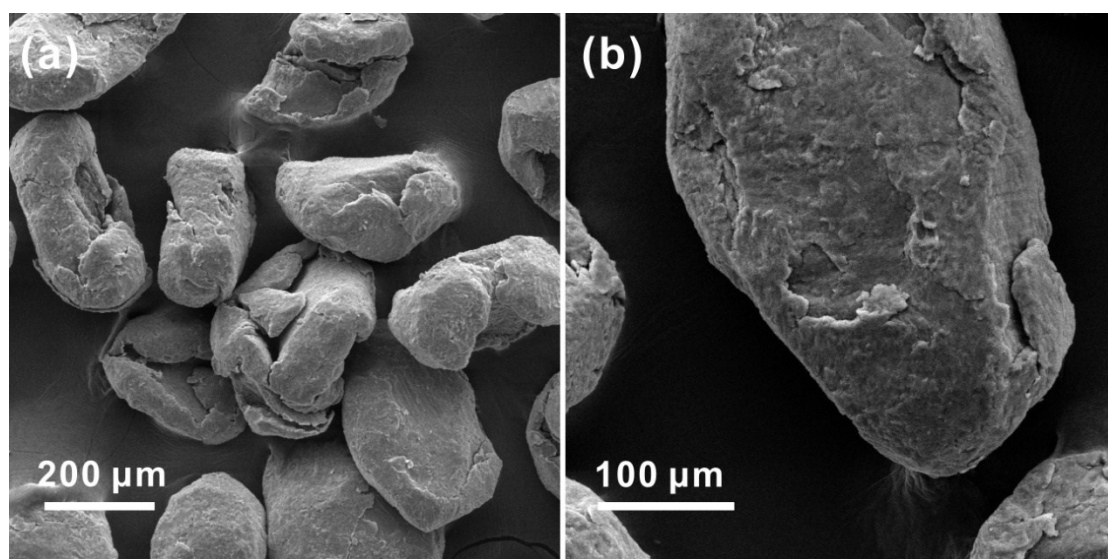

Fig. S2 SEM images of Mg powder.

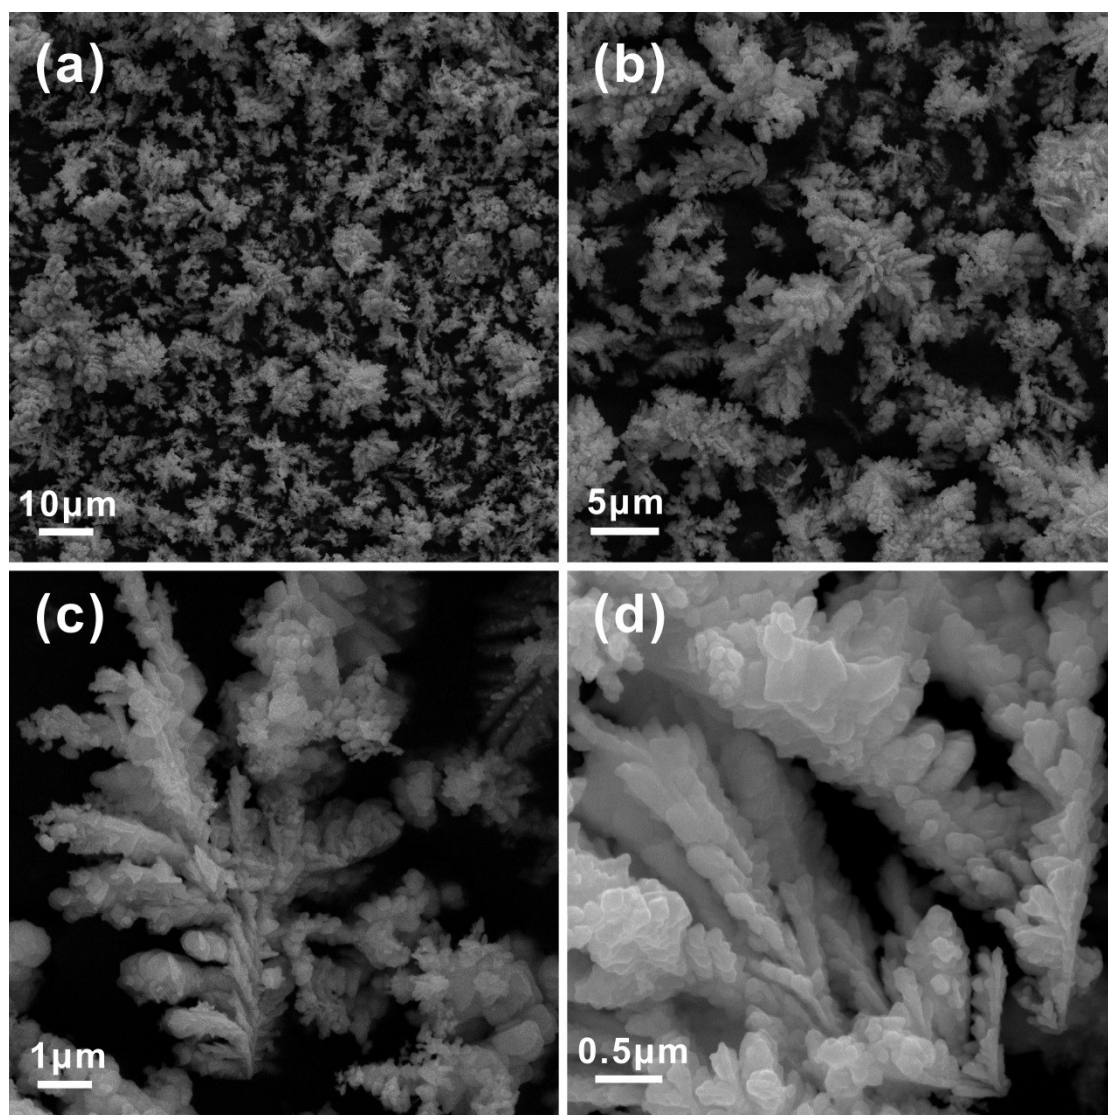

Fig. S3 SEM images of the prepared CL-Sb.

## References

- 1 B. J. Yang, Y. C. Wu, H. M. Hu, C. Li, X. G. Yang and Y. T. Qian, *Mater. Chem. Phys.*, 2005, **92**, 286-289.
- 2 M. H. Rashid and T. K. Mandal, *J. Phys. Chem. C*, 2007, **111**, 16750-16760.
- 3 G. Zhang, S. Sun, M. N. Banis, R. Li, M. Cai and X. Sun, *Cryst. Growth Des.*, 2011, **11**, 2493-2499.
- 4 B. Farbod, K. Cui, W. P. Kalisvaart, M. Kupsta, B. Zahiri, A. Kohandehghan, E. M. Lotfabad, Z. Li, E. J. Luber and D. Mitlin, *ACS Nano*, 2014, **8**, 4415-4429.
- 5 L. Baggetto, H.-Y. Hah, C. E. Johnson, C. A. Bridges, J. A. Johnson and G. M. Veith, *Phys. Chem. Chem. Phys.*, 2014, **16**, 9538-9545.
- 6 I. T. Kim, E. Allcorn and A. Manthiram, *Phys. Chem. Chem. Phys.*, 2014.
- 7 M. He, M. Walter, K. V. Kravchyk, R. Erni, R. Widmer and M. Kovalenko, *Nanoscale*, 2014.
- 8 L. Ji, M. Gu, Y. Shao, X. Li, M. H. Engelhard, B. W. Arey, W. Wang, Z. Nie, J. Xiao and C. Wang, *Adv. Mater.*, 2014, **26**, 2901-2908.
- 9 L. Li, K. H. Seng, D. Li, Y. Xia, H. K. Liu and Z. Guo, *Nano Res.*, 2014, **7**, 1466-1476.
- 10 L. Xiao, Y. Cao, J. Xiao, W. Wang, L. Kovarik, Z. Nie and J. Liu, *Chem. Commun.*, 2012, **48**, 3321-3323.
- 11 Y.-M. Lin, P. R. Abel, A. Gupta, J. B. Goodenough, A. Heller and C. B. Mullins, *ACS Appl. Mater. Interfaces*, 2013, **5**, 8273-8277.
- 12 D.-H. Nam, K.-S. Hong, S.-J. Lim and H.-S. Kwon, *J. Power Sources*, 2014, **247**, 423-427.
- 13 L. Baggetto, E. Allcorn, R. R. Unocic, A. Manthiram and G. M. Veith, *J. Mater. Chem. A*, 2013, **1**, 11163-11169.
- 14 L. Baggetto, M. Marszewski, J. Górka, M. Jaroniec and G. M. Veith, *J. Power Sources*, 2013, **243**, 699-705.
- 15 Y. Zhu, X. Han, Y. Xu, Y. Liu, S. Zheng, K. Xu, L. Hu and C. Wang, *ACS Nano*, 2013, **7**, 6378-6386.
- 16 L. Wu, X. Hu, J. Qian, F. Pei, F. Wu, R. Mao, X. Ai, H. Yang and Y. Cao, *Energy Environ. Sci.*, 2014, **7**, 323-328.
- 17 Y. N. Ko and Y. C. Kang, *Chem. Commun.*, 2014, **50**, 12322-12324.
- 18 X. Zhou, Y. Zhong, M. Yang, M. Hu, J. Wei and Z. Zhou, *Chem. Commun.*, 2014, **50**, 12888-12891.
- 19 J. Qian, Y. Chen, L. Wu, Y. Cao, X. Ai and H. Yang, *Chem. Commun.*, 2012, **48**, 7070-7072.
- 20 W. Luo, S. Lorget, B. Wang, C. Bommier and X. Ji, *Chem. Commun.*, 2014, **50**, 5435-5437.
- 21 X. Zhou, Z. Dai, J. Bao and Y.-G. Guo, *J. Mater. Chem. A*, 2013, **1**, 13727-13731.
- 22 C. Nithya and S. Gopukumar, *J. Mater. Chem. A*, 2014, **2**, 10516-10525.
- 23 H. Hou, Y. Yang, Y. Zhu, M. Jing, C. Pan, L. Fang, W. Song, X. Yang and X. Ji, *Electrochim. Acta*, 2014, **146**, 328-334.
- 24 D.-H. Nam, K.-S. Hong, S.-J. Lim, M.-J. Kim and H.-S. Kwon, *Small*, 2015, DOI: 10.1002/smll.201500491.
- 25 L. Fan, J. Zhang, J. Cui, Y. Zhu, J. Liang, L. Wang and Y. Qian, *J. Mater. Chem. A*, 2015, **3**, 3276-3280.
- 26 L. Wu, H. Lu, L. Xiao, X. Ai, H. Yang and Y. Cao, *J. Mater. Chem. A*, 2015, **3**, 5708-5713.
- 27 N. Li, S. Liao, Y. Sun, H. W. Song and C. X. Wang, *J. Mater. Chem. A*, 2015, **3**, 5820-5828.
- 28 M. He, K. Kravchyk, M. Walter and M. V. Kovalenko, *Nano Lett.*, 2014, **14**, 1255-1262.
- 29 A. Darwiche, C. Marino, M. T. Sougrati, B. Fraisse, L. Stievano and L. Monconduit, *J. Am. Chem. Soc.*, 2012, **134**, 20805-20811.
- 30 H. Hou, M. Jing, Y. Yang, Y. Zhu, L. Fang, W. Song, C. Pan, X. Yang and X. Ji, *ACS Appl. Mater. Interfaces*, 2014, **6**, 16189-16196.
- 31 H. Hou, M. Jing, Y. Yang, Y. Zhang, Y. Zhu, W. Song, X. Yang and X. Ji, *J. Mater. Chem. A*, 2015, **3**, 2971-2977.
